# Supplementary material
Source: Springer Nature journal article supplement (https://www.springermedizin.de/resource/supplementary/12995_2008_94_MOESM4_ESM.pdf/9622728)

# Nurse

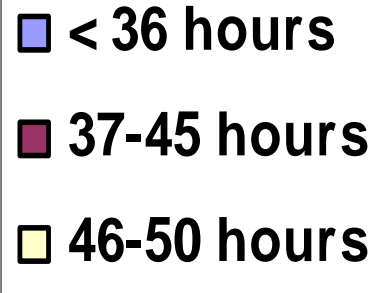

**35.1 %  
stress**

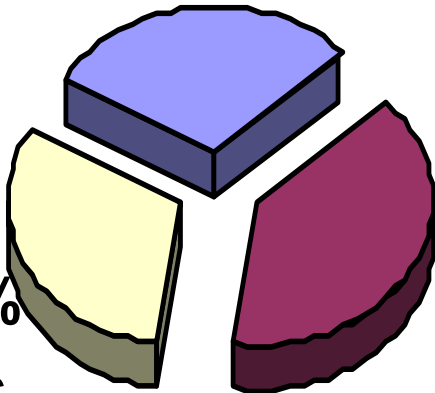

**36.4 %  
stress**

**46.7 %  
stress**

Supplement: MOESM4 [file 9622728]
